# Supplementary material for: Pathogenic and therapeutic role for NRF2 signaling in ultraviolet light–induced skin pigmentation
Source: JCI journal article supplement (doi:10.1172/jci.insight.139342), 2020-10-01
Supplement: sd1 [file 1]

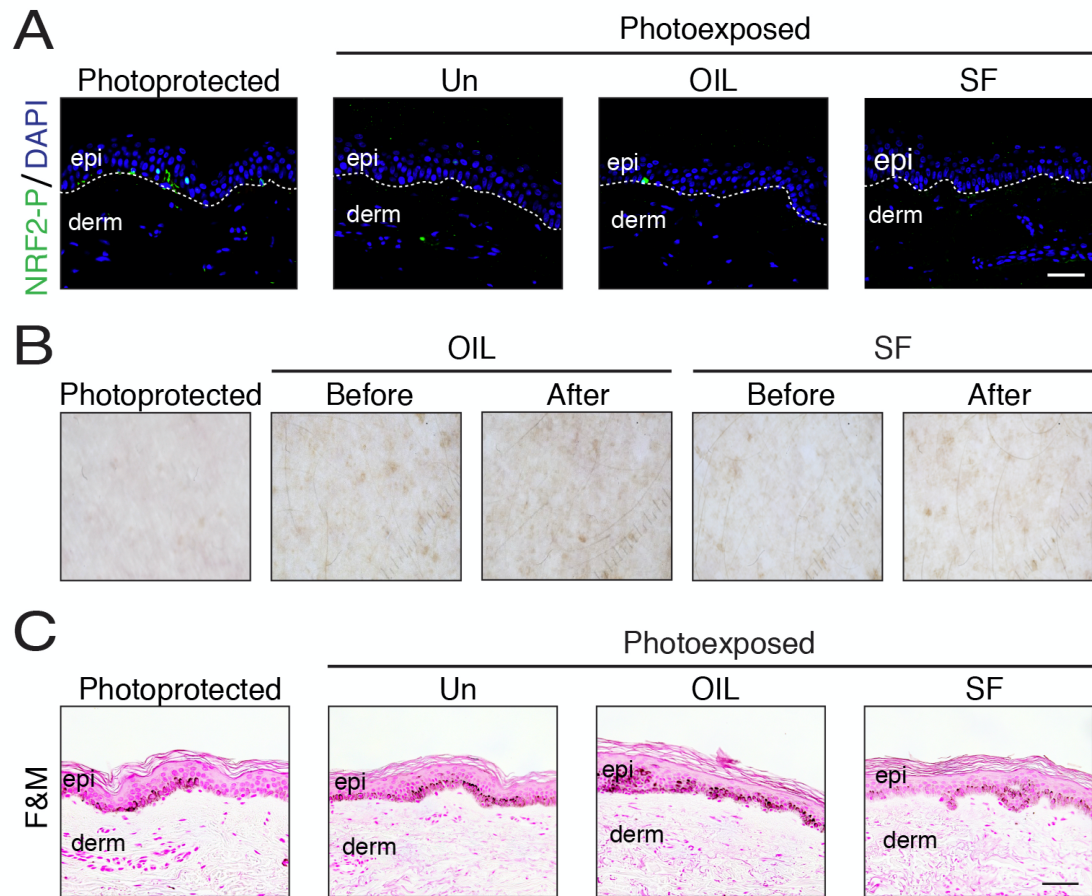

**Figure S1. Lack of NRF2 induction in response to NRF2 agonist treatment corresponds to no reduction in hyperpigmentation in photodamaged skin.** Photoprotected and photoexposed skin either received vehicle (OIL) or sulfuraphane (SF) treatment. (A) Representative indirect immunofluorescence for NRF2 and NRF2-P. DAPI, nuclear staining; epi, epidermis; derm, dermis. Dotted lines delineate the dermoepidermal junction. Scale bar = 50  $\mu$ m. Asterisks mark areas of increased immunofluorescence signal. (B) Representative dermoscopy images. (C) Representative Fontana-Mason (F&M) staining. sc, stratum corneum; epi, epidermis; derm, dermis. Scale bar = 50  $\mu$ m.

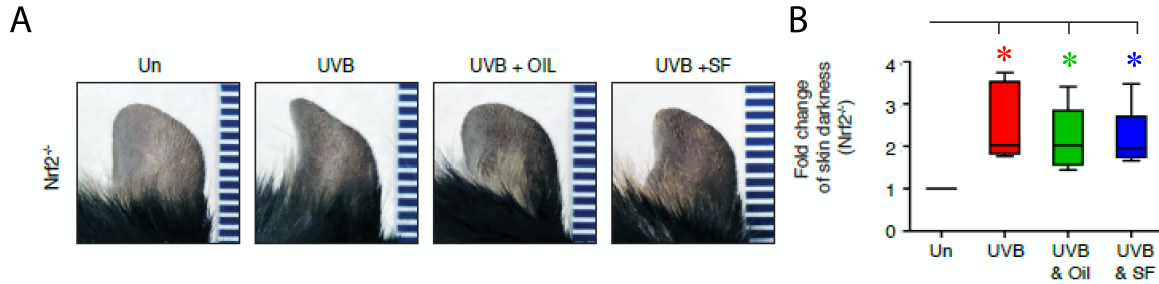

**Figure S2. NRF2 agonist prevention of UVB-induced skin ear pigmentation in mice is specific to NRF2 signaling.** (A) Schematic of preventative treatment regimen for NRF2<sup>-/-</sup> mice that were either Unreated (*Un*) or received UVB exposure alone (*UVB*), UVB + vehicle treatment (*UVB+OIL*) UVB + NRF2 agonist (SF) treatment (*UVB+SF*). (B) Mean fold change of skin darkness  $\pm$  s.e.m. Mean fold change  $\pm$  s.e.m. \* $P < 0.05$ , between indicated groups as calculated by a Mann-Whitney U test.  $P$  values were corrected for multiple comparisons using a Bonferroni correction.
